# Supplementary material
Source: PubMed Central journal article supplement (PMC5410995)
Supplement: NIHMS52207-supplement-Appendix.pdf [file NIHMS52207-supplement-Appendix.pdf]

## Appendix

We introduce the following notation for the bivariate distribution (3)

$$\mathbf{x}_i = \begin{pmatrix} y_i \\ z_i \end{pmatrix}, \quad \boldsymbol{\lambda}_i = \begin{pmatrix} \theta_i \\ u_i \end{pmatrix}, \quad \mathbf{S}_i = \begin{pmatrix} s_i^2 & \rho s_i \\ \rho s_i & 1 \end{pmatrix}$$

The joint distribution of  $y_i$  and  $z_i$  is  $f(y_i, z_i) = 2 \frac{1}{\sqrt{2\pi|S_i|}} e^{-\frac{1}{2}(\mathbf{x}_i - \boldsymbol{\lambda}_i)' \mathbf{S}_i^{-1} (\mathbf{x}_i - \boldsymbol{\lambda}_i)}$ . Note that  $f(y_i, z_i)$  is the probability density function of a bivariate normal multiplied by 2 because the truncation constraint in the positive  $z_i$  values reduces the area of a bivariate normal by half.

We are interested in the marginal distribution of  $z_i$ ,  $f_{z_i}(y_i, z_i) = \int_{-\infty}^{+\infty} f(y_i, z_i) dz$ .

Cartinhour found a closed form expression for the marginal distributions of a truncated multivariate normal distribution [36]. More specifically, he found that the marginal distribution is a truncated normal density multiplied by a skew function. Following his formula the marginal distribution of  $z_i$  is

$$f_{z_i}(y_i, z_i) = 2 \frac{1}{\sqrt{2\pi}} e^{-\frac{1}{2}(z_i - u_i)^2} \int_{-\infty}^{+\infty} \frac{1}{\sqrt{2\pi|S_i^2|}} e^{-\frac{\frac{1}{2}(y_i - \mu_i + \rho s_i(z_i - u_i))^2}{s_i^2}} dx$$

It is easily seen that the first part of the equation ( $2 \frac{1}{\sqrt{2\pi}} e^{-\frac{1}{2}(z_i - u_i)^2}$ ) refers to the probability density function of a normally distributed random variable truncated on  $[0, +\infty)$  whereas the second part (induced by the a skewed distribution [36]) is the area under the curve of a normally distributed random variable on its entire sample space and is equal to one. Consequently, the marginal distribution of  $z_i$  is a truncated normal distribution, i.e.  $z_i \sim N(u_i, 1)I_{z_i > 0}$ . If there were truncation constraints for  $y_i$ , the truncated normal for  $z_i$  would not hold as the integral limits would refer to the part of the sample space  $y_i$  is truncated at and the integral would not be equal to one.
